# Supplementary material for: Enhancement of seawater corrosion resistance in copper using acetone-derived graphene coating
Source: Royal Society of Chemistry journal article supplement (doi:10.1039/c3nr05997a), 2014-01-01
Supplement: c3nr05997a1.pdf [file c3nr05997a1.pdf]

Supplementary Information for

**Enhancement of Seawater Corrosion Resistance in Copper Using Acetone-Derived Graphene Coating**

Jae-Hoon Huh,<sup>a,b</sup> Seung Hyun Kim,<sup>c</sup> Jae Hwan Chu,<sup>a</sup> Sung Youb Kim,<sup>b,c</sup> Ji Hyun Kim,<sup>\*,a,c</sup>  
and Soon-Yong Kwon<sup>\*,a,b,c</sup>

<sup>a</sup> School of Materials Science and Engineering, Ulsan National Institute of Science and  
Technology (UNIST), Ulsan 689-798, South Korea

<sup>b</sup> Opto-Electronics Convergence Group & Low Dimensional Carbon Materials Center, Ulsan  
National Institute of Science and Technology (UNIST), Ulsan 689-798, South Korea

<sup>c</sup> School of Mechanical and Nuclear Engineering, Ulsan National Institute of Science and  
Technology (UNIST), Ulsan 689-798, South Korea

\*To whom correspondence should be addressed. Email: [kimjh@unist.ac.kr](mailto:kimjh@unist.ac.kr),  
[sykwon@unist.ac.kr](mailto:sykwon@unist.ac.kr)

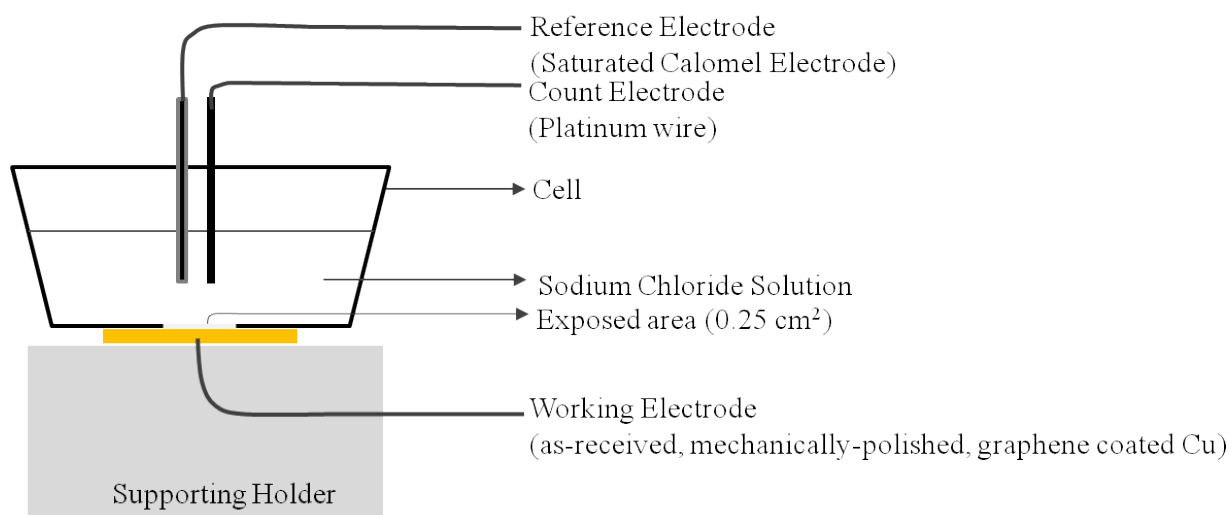

**Figure S1:** Three-electrode cell configuration for electrochemical corrosion test of as-received, mechanically-polished, and graphene-coated Cu.

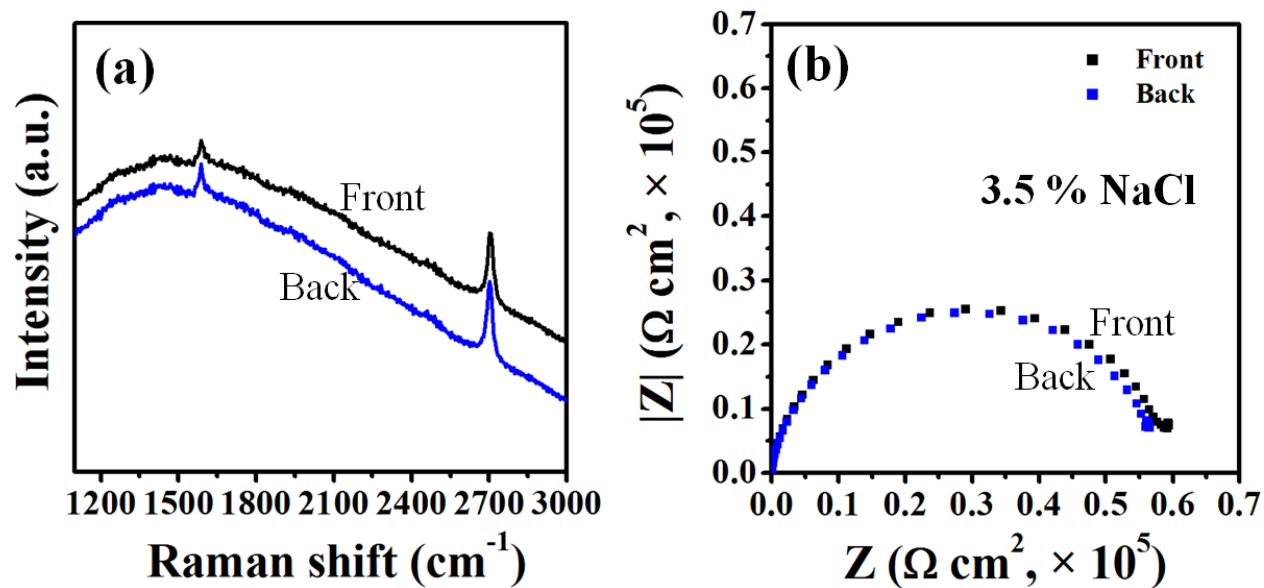

**Figure S2:** (a) Raman spectra of graphene films grown on front and back sides of Cu foil after growth at 1,000 °C for 3 min. (b) Impedance behavior of front and back sides of graphene-coated Cu in seawater condition.

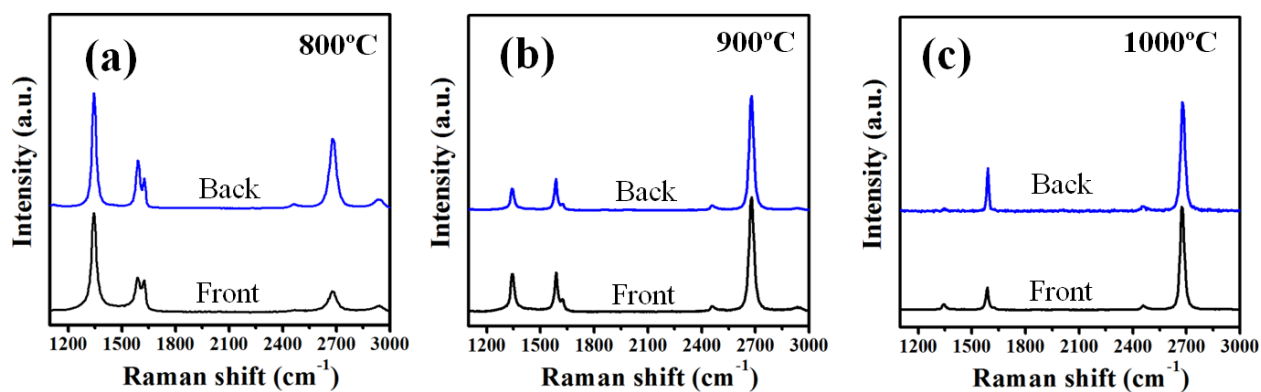

**Figure S3:** Raman spectra of graphene films transferred onto SiO<sub>2</sub>(300 nm)/Si substrates after growth at (a) 800 °C, (b) 900 °C, and (c) 1,000 °C for 3 min. Note that graphene grew on both the front and back side of the Cu foil.

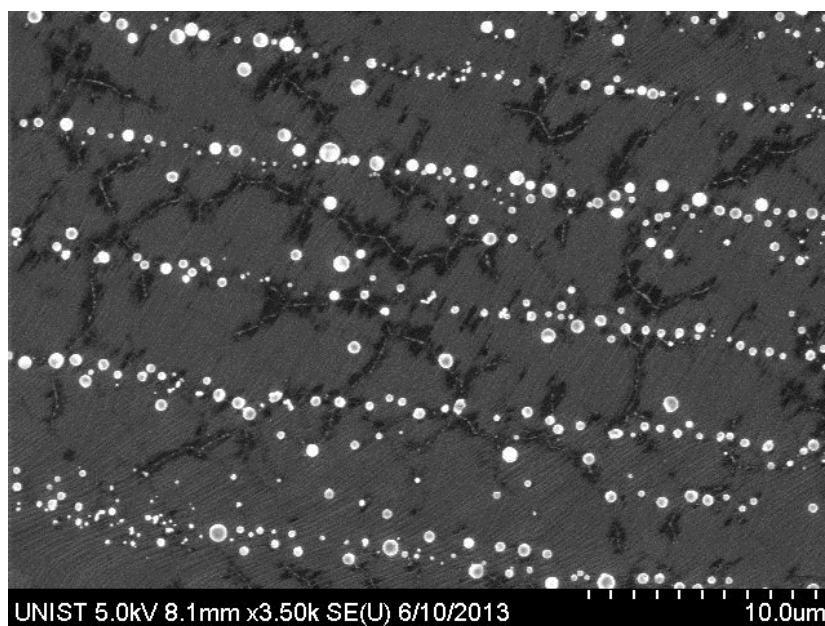

**Figure S4:** SEM image of corrosion diffusion traces through grain boundary of monolayer graphene-coated Cu after EIS test in 3.0 % NaCl solution.
